# Supplementary material
Source: PubMed Central journal article supplement (PMC6874109)
Supplement: NIHMS1540171-supplement-Supplemental_Material.pdf [file NIHMS1540171-supplement-Supplemental_Material.pdf]

# Supplemental Materials

## Effects of replacing dietary monounsaturated fat with carbohydrate on HDL protein metabolism and proteome composition in humans

Allison B. Andraski<sup>1</sup>, Sasha A. Singh<sup>2</sup>, Lang Ho Lee<sup>2</sup>, Hideyuki Higashi<sup>2</sup>, Nathaniel Smith<sup>1</sup>,  
Bo Zhang<sup>1,4</sup>, Masanori Aikawa<sup>2,3</sup>, and Frank M. Sacks<sup>1,3</sup>

<sup>1</sup> Department of Nutrition, Harvard T.H. Chan School of Public Health, Boston, MA 02115, USA

<sup>2</sup> Center for Interdisciplinary Cardiovascular Sciences, Department of Medicine, Brigham and Women's Hospital, Harvard Medical School, Boston, MA 02115, USA

<sup>3</sup> Channing Division of Network Medicine, Department of Medicine, Brigham and Women's Hospital, Harvard Medical School, Boston, MA 02115, USA

<sup>4</sup> Department of Biochemistry, Fukuoka University School of Medicine, Fukuoka, Japan

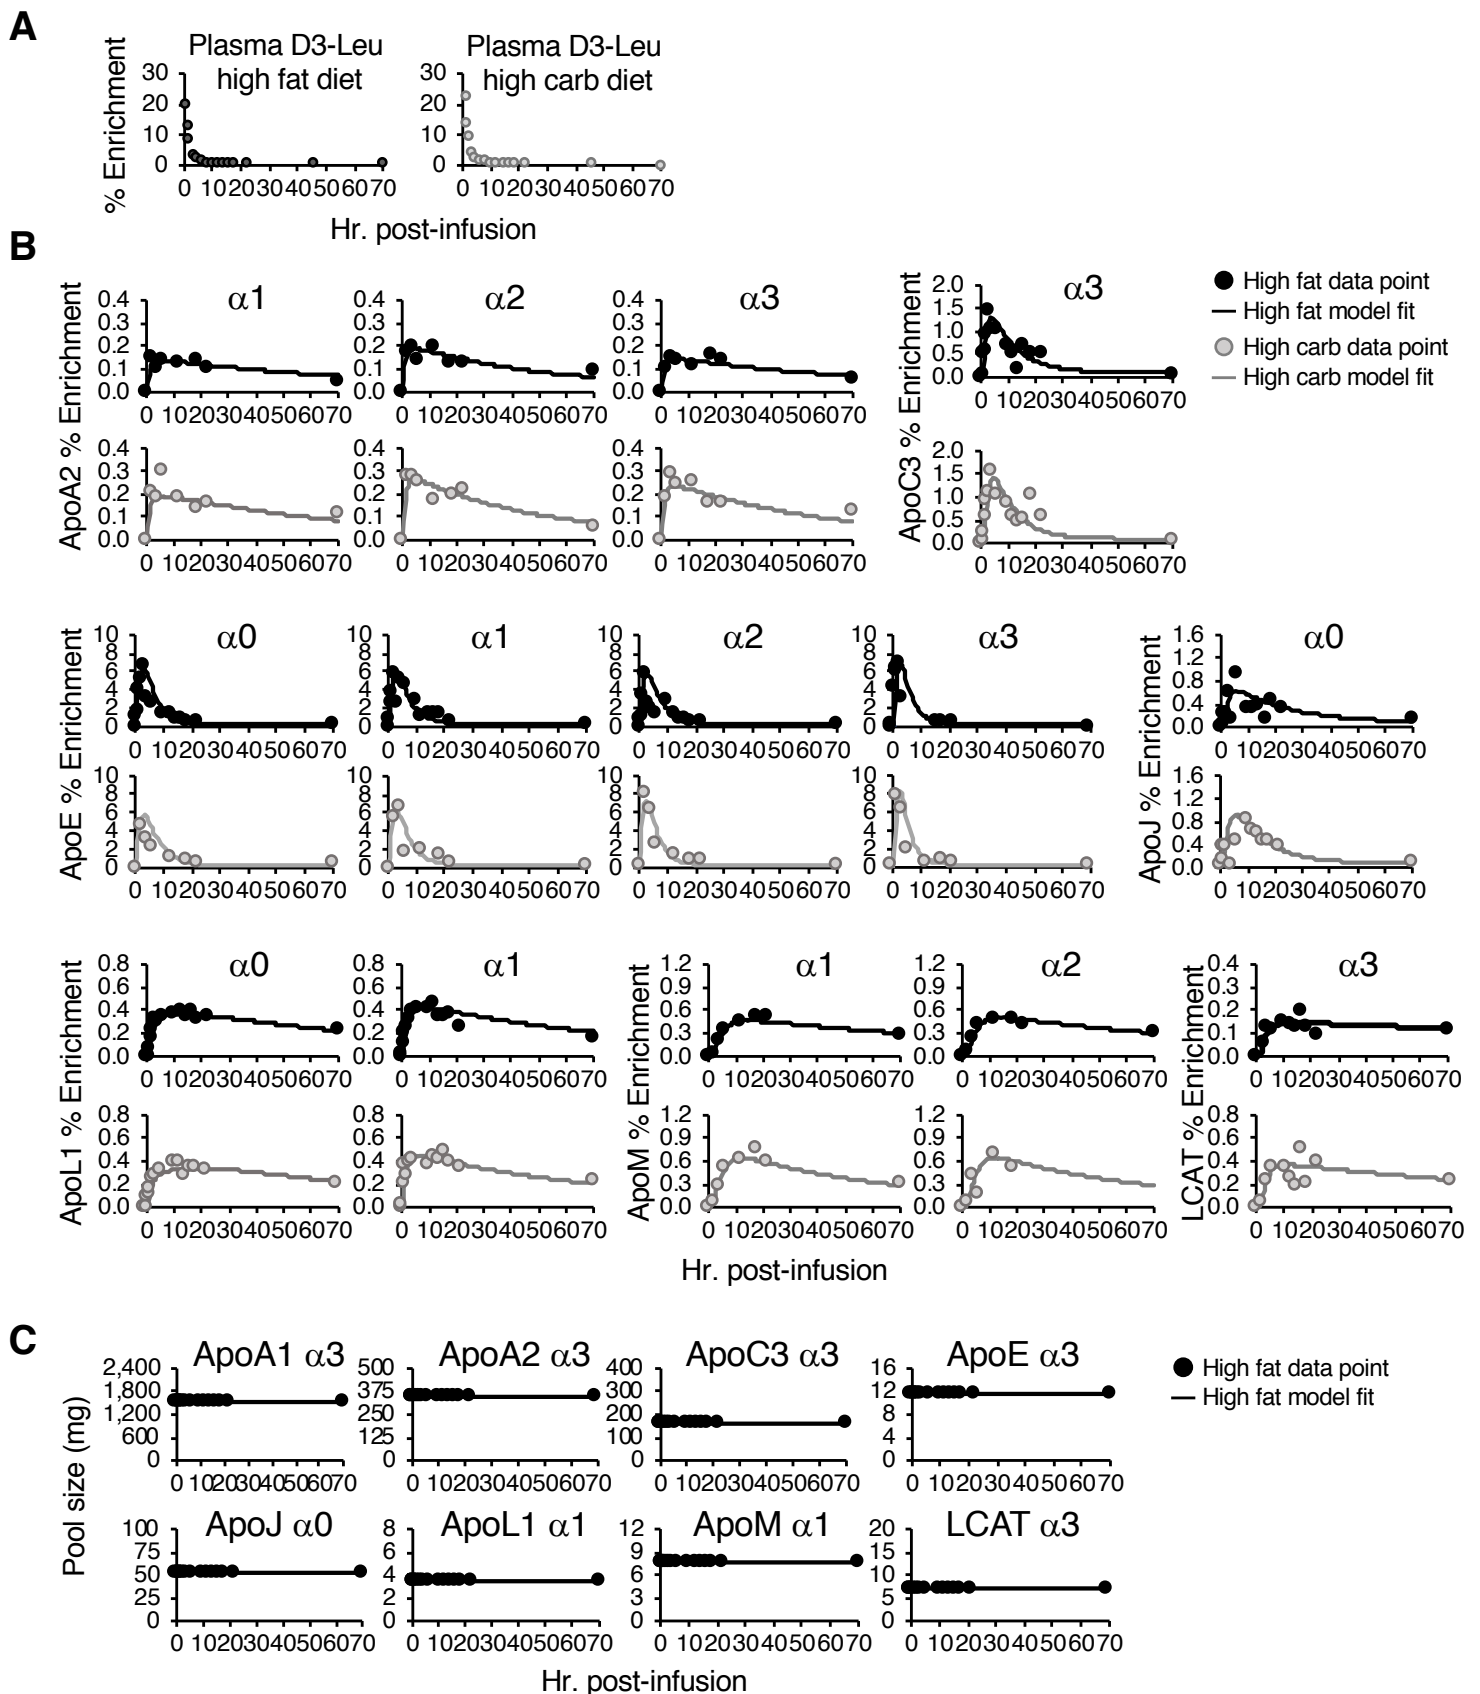

**Supplemental Figure I. Tracer enrichment and pool size model fits for HDL proteins.**

(A) Representative plasma D3-Leu tracer enrichment curves. Plasma D3-Leu enrichment was the input for each kinetic model and describes the behavior of the amino acid precursor pool (D3-Leu tracer enrichment in plasma). The same plasma D3-Leu enrichment curve was used for all 8 protein models per participant per diet. Representative enrichment curve (B) and pool size (C) model fits for ApoA2, ApoC3, ApoE, ApoJ, ApoL1, ApoM, and LCAT. ApoA1 enrichment curve model fits are shown in **Figure 4A**. Fits were generated using the kinetic models shown in **Figures 4-6**. Model fits are from one representative participant (#6), with the exception of ApoA2 and ApoM in which participant #1 and 3 were used, respectively.

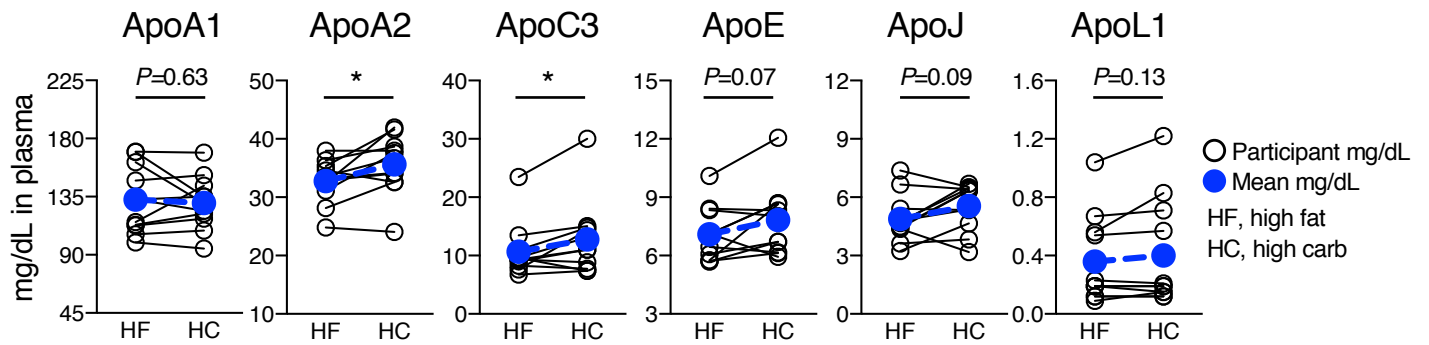

**Supplemental Figure II. Plasma protein concentrations on the high fat and high carbohydrate diets.** Fasting plasma protein concentrations after 4 weeks on the high fat (HF) and high carbohydrate (HC) diets (n=11, participants #1, 3-12). Values on each diet were compared by two-tailed, paired *t*-test. Significant differences between diets are highlighted (\*,  $P < 0.05$ ), and non-significant *P*-values are shown.

**A**

Removal of ApoA1 out of each HDL size

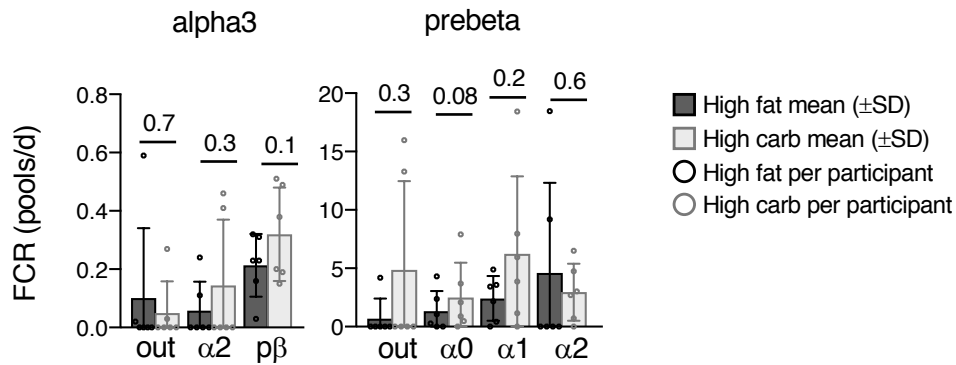**B**

Flux of ApoA1 into each HDL size

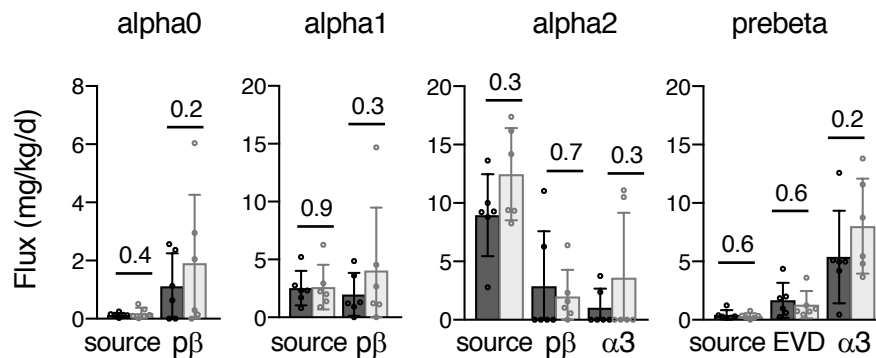**Supplemental Figure III. ApoA1 metabolic pathways out of and into each HDL size.**

(A) Rate of ApoA1 removal out of alpha3 and prebeta HDL by each removal pathway (pools/day). (B) Flux of ApoA1 into alpha0, alpha1, alpha2, and prebeta HDL by each flux pathway (mg/kg/day). (A-B) Mean ( $\pm$ SD) values from participants #1-6 on both diets are shown. Values between diets were compared by two-tailed, paired *t*-test, and *P*-values are shown above each size fraction. Out, removal pathway out of the HDL system; EVD, extravascular delay compartment (see ApoA1 model, **Figure 4B**).

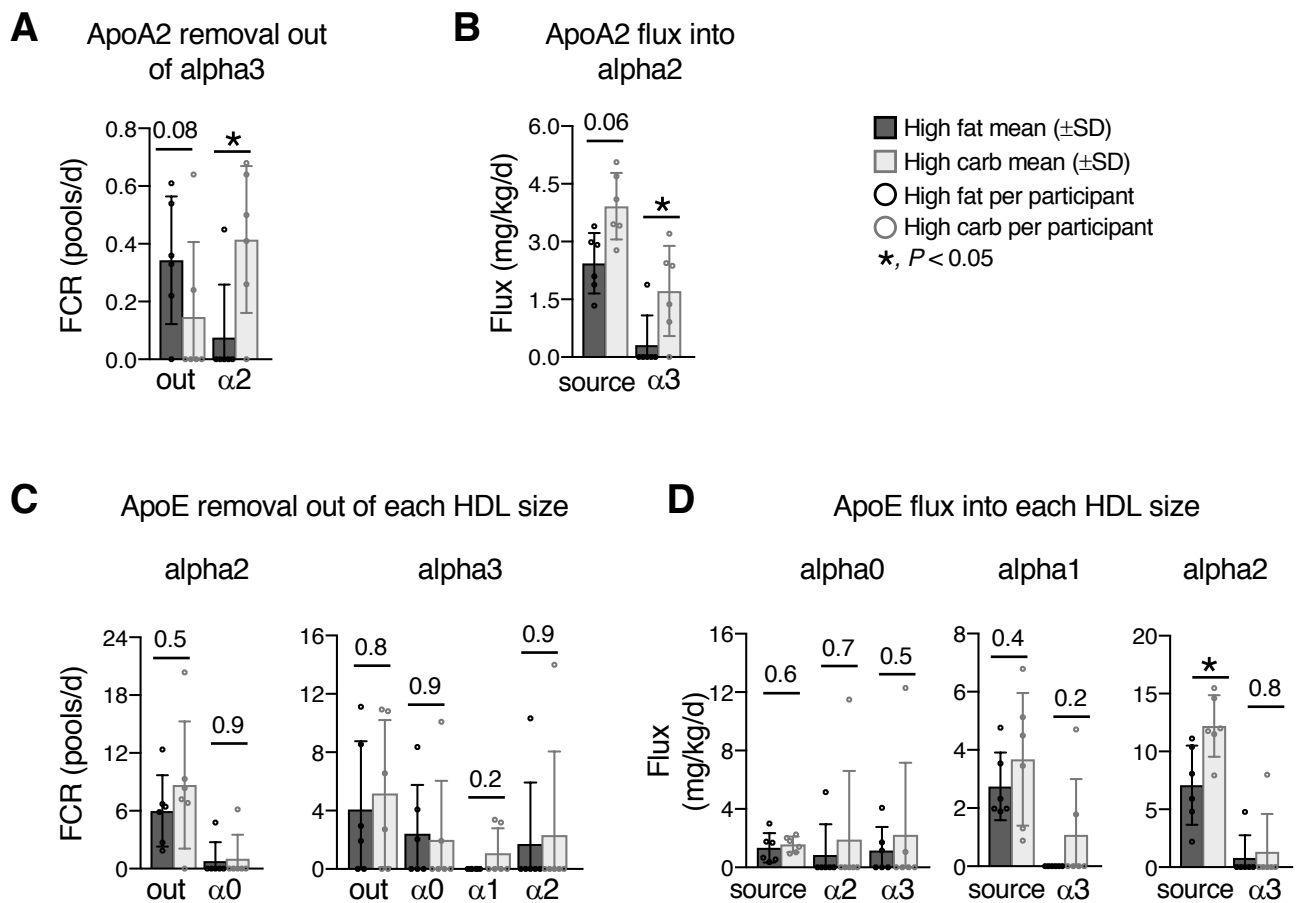

**Supplemental Figure IV. ApoA2 and ApoE metabolic pathways out of and into each HDL size.** (A) Rate of ApoA2 removal out of alpha3 HDL by each removal pathway (pools/day). (B) Flux of ApoA2 into alpha2 HDL by each flux pathway (mg/kg/day). (C) Rate of ApoE removal out of alpha2 and alpha3 by each removal pathway. (D) Flux of ApoE into alpha0, alpha1, and alpha2 by each flux pathway. (A-D) Mean (SD) values from participants #1-6 on both diets are shown. Values between diets were compared by two-tailed, paired  $t$ -test.  $P$ -values are shown above each size fraction. \*,  $P < 0.05$ ; out, removal pathway out of the modeled HDL system.

**A** ApoL1 removal out of alpha1

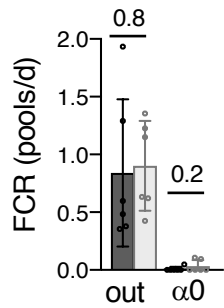

**B** ApoL1 flux into alpha0

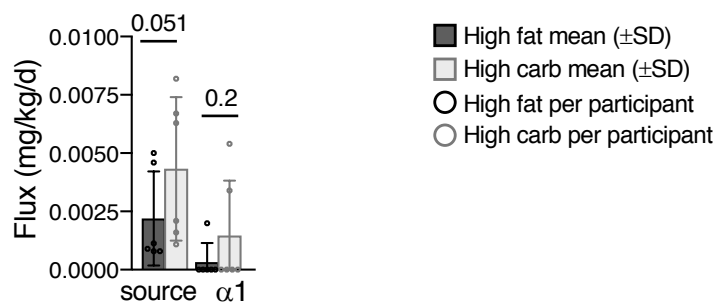

■ High fat mean (±SD)  
□ High carb mean (±SD)  
○ High fat per participant  
○ High carb per participant

**Supplemental Figure V. ApoL1 metabolic pathways out of and into each HDL size.**

(A) Rate of ApoL1 removal out of alpha1 HDL by each removal pathways (pools/day). (B) Flux of ApoL1 into alpha0 HDL by each flux pathway (mg/kg/day). (A-B) Mean (SD) values from participants #1-6 on both diets are shown. Values between diets were compared by two-tailed, paired *t*-test, and *P*-values are shown above each size fraction. Out, removal pathway out of the modeled HDL system.

| Participant ID# | Gender             | Race               | Age        | Height (m)     | Weight (kg)    | BMI (kg/m <sup>2</sup> ) | Glucose (mg/dl) | TG (mg/dl)     | Total-C (mg/dl) | LDL-C (mg/dl) | HDL-C (mg/dl) |
|-----------------|--------------------|--------------------|------------|----------------|----------------|--------------------------|-----------------|----------------|-----------------|---------------|---------------|
| 1*              | female             | black              | 33         | 1.70           | 85.8           | 29.6                     | 86              | 50             | 142             | 95            | 37            |
| 2*              | male               | white              | 39         | 1.85           | 110.3          | 32.1                     | 92              | 138            | 176             | 103           | 45            |
| 3*              | male               | white              | 49         | 1.73           | 94.2           | 31.5                     | 78              | 262            | 158             | 82            | 24            |
| 4*              | male               | black              | 48         | 1.75           | 91.7           | 29.8                     | 84              | 64             | 171             | 116           | 42            |
| 5*              | female             | white              | 25         | 1.69           | 75.6           | 26.5                     | 84              | 54             | 132             | 73            | 48            |
| 6*              | female             | white              | 40         | 1.68           | 86.1           | 30.6                     | 91              | 139            | 219             | 147           | 44            |
| 7               | female             | black              | 25         | 1.58           | 87.2           | 35.1                     | 92              | 62             | 145             | 85            | 48            |
| 8               | female             | white              | 23         | 1.58           | 68.8           | 27.7                     | 84              | 87             | 123             | 59            | 47            |
| 9               | female             | white              | 70         | 1.65           | 85.5           | 31.3                     | 99              | 72             | 193             | 125           | 54            |
| 10              | female             | white              | 62         | 1.60           | 90.5           | 35.3                     | 96              | 76             | 175             | 105           | 55            |
| 11              | female             | white              | 33         | 1.61           | 80.8           | 31.0                     | 80              | 88             | 193             | 122           | 53            |
| 12              | male               | white              | 59         | 1.83           | 92.8           | 27.7                     | 86              | 59             | 144             | 96            | 36            |
| Mean (SD)       | 8 female<br>4 male | 9 white<br>3 black | 42<br>(16) | 1.69<br>(0.09) | 87.4<br>(10.3) | 30.7<br>(2.7)            | 87.7<br>(6.4)   | 95.9<br>(60.1) | 164<br>(29)     | 101<br>(25)   | 44.4<br>(8.8) |

**Supplemental Table I. Clinical data at baseline.** BMI, body mass index; TG, triglyceride; total-C, total cholesterol; LDL-C, LDL cholesterol; HDL-C, HDL cholesterol; \*, participants included in the HDL protein metabolism analysis.

| Protein | Peptide Sequence | M0 <i>m/z</i> | M3 <i>m/z</i> | Isolation <i>m/z</i> | <i>z</i> | Ion type  | RT (min)  |
|---------|------------------|---------------|---------------|----------------------|----------|-----------|-----------|
| ApoA1   | ATEHLSTLSEK      | 405.8787      | 407.8913      | 406.8850             | 3        | precursor | 10-14     |
|         | LSEK             | 476.2715      | 479.2903      |                      | 1        | y4        |           |
|         | TLSEK            | 577.3192      | 580.3380      |                      | 1        | y5        | 17.5-19.5 |
|         | THLAPYSDELRL     | 434.5543      | 436.5669      | 435.5606             | 3        | precursor |           |
|         | THL              | 352.1979      | 355.2168      |                      | 1        | b3        |           |
|         | THLA             | 423.2350      | 426.2539      |                      | 1        | b4        |           |
|         | THLAP            | 520.2878      | 523.3066      |                      | 1        | b5        |           |
|         | ELR              | 417.2456      | 420.2644      |                      | 1        | y3        |           |
|         | DELRL            | 532.2726      | 535.2914      |                      | 1        | y4        |           |
|         | VKDLATVYVDVLK    | 488.2887      | 490.3013      | 489.2950             | 3        | precursor | 25-29     |
|         | VLK              | 359.2653      | 362.2841      |                      | 1        | y3        |           |
| DVLK    | 474.2922         | 477.3111      |               | 1                    | y4       |           |           |
| VDVLK   | 573.3606         | 576.3795      |               | 1                    | y5       |           |           |
| ApoA2   | SKEQLTPLIK       | 578.8504      | 581.8693      | 580.3599             | 2        | precursor | 16.5-18.5 |
|         | PLIK             | 470.3337      | 473.3525      |                      | 1        | y4        |           |
|         | TPLIK            | 571.3814      | 574.4002      |                      | 1        | y5        |           |
| ApoC3   | DALSSVQESQVAQQAR | 858.9292      | 860.4386      | 859.6839             | 2        | precursor | 20.5-22.5 |
|         | DAL              | 300.1554      | 303.1742      |                      | 1        | b3        |           |
|         | DALS             | 387.1874      | 390.2063      |                      | 1        | b4        |           |
|         | DALSS            | 474.2195      | 477.2383      |                      | 1        | b5        |           |
| ApoE    | LGPLVEQGR        | 484.7798      | 487.7986      | 486.2892             | 2        | precursor | 17-19     |
|         | LGP              | 268.1656      | 271.1844      |                      | 1        | b3        |           |
|         | LGPL             | 381.2496      | 384.2685      |                      | 1        | b4        |           |
|         | LGPLV            | 480.3180      | 483.3369      |                      | 1        | b5        |           |
| ApoJ    | ELDESLQVAER      | 644.8226      | 647.8414      | 646.3320             | 2        | precursor | 20-22     |
|         | EL               | 243.1339      | 246.1527      |                      | 1        | b2        |           |
|         | ELD              | 358.1609      | 361.1797      |                      | 1        | b3        |           |
|         | ELDE             | 487.2035      | 490.2223      |                      | 1        | b4        |           |
| ApoL1   | ALDNLAR          | 386.7192      | 389.7381      | 388.2287             | 2        | precursor | 14.5-17   |
|         | NLAR             | 473.2831      | 476.3019      |                      | 1        | y4        |           |
|         | DNLAR            | 588.3100      | 591.3288      |                      | 1        | y5        |           |
| ApoM    | FLLYNR           | 413.2345      | 416.2533      | 414.7439             | 2        | precursor | 21-23     |
|         | FL               | 261.1598      | 264.1786      |                      | 1        | b2        |           |
|         | LYNR             | 565.3093      | 568.3281      |                      | 1        | y4        |           |
|         | LLYNR            | 678.3933      | 681.4122      |                      | 1        | y5        |           |
| LCAT    | SSGLVSNAPGVQIR   | 692.8808      | 694.3992      | 693.6400             | 2        | precursor | 20-22     |
|         | SSGL             | 317.1819      | 320.2007      |                      | 1        | a4        |           |
|         | SSGLV            | 416.2504      | 419.2692      |                      | 1        | a5        |           |
|         | SSGL             | 345.1769      | 348.1957      |                      | 1        | b4        |           |
|         | SSGLV            | 444.2453      | 447.2641      |                      | 1        | b5        |           |

**Supplemental Table II. Peptides and their corresponding fragment ions used to quantify enrichment by parallel reaction monitoring (PRM).** *m/z*, mass-to-charge of the M0 (D0-Leu) and M3 (D3-Leu) fragment ions, and the average mass used for PRM isolation (10 Da isolation window). Typical retention time (RT) range used for a 30 minute reverse phase gradient, one representative participant (#6, high fat) is shown. Fragment ions with multiple leucines were measured as singly labeled since the probability of observing multiple D3-leucines is lower.



| Protein | Fraction  | High Fat<br>Mean (SD) | High Carb<br>Mean (SD) | <i>t</i> -test<br><i>P</i> -value | Protein | High Fat<br>Mean (SD) | High Carb<br>Mean (SD) | <i>t</i> -test<br><i>P</i> -value |
|---------|-----------|-----------------------|------------------------|-----------------------------------|---------|-----------------------|------------------------|-----------------------------------|
| ApoA1   | α0        | 31 (10)               | 26 (15)                | 0.64                              | ApoJ    | 86 (44)               | 122 (58)               | 0.0070                            |
|         | α1        | 582 (246)             | 366 (301)              | 0.029                             |         | 46 (10)               | 41 (20)                | 0.55                              |
|         | α2        | 2100 (732)            | 1969 (776)             | 0.74                              |         | 31 (15)               | 27 (11)                | 0.69                              |
|         | α3        | 2085 (890)            | 2227 (426)             | 0.73                              |         | 26 (10)               | 23 (5.6)               | 0.38                              |
|         | preβ      | 87 (59)               | 54 (28)                | 0.27                              |         | 3.6 (2.8)             | 1.7 (1.7)              | 0.27                              |
|         | total HDL | 4885 (1093)           | 4642 (969)             | 0.39                              |         | 192 (46)              | 214 (85)               | 0.29                              |
| ApoA2   | α0        | 3.5 (2.7)             | 4.0 (2.2)              | 0.78                              | ApoL1   | 0.49 (0.48)           | 0.54 (0.27)            | 0.75                              |
|         | α1        | 57 (34)               | 95 (67)                | 0.37                              |         | 4.2 (1.4)             | 4.8 (1.9)              | 0.089                             |
|         | α2        | 465 (152)             | 647 (245)              | 0.22                              |         | 0.86 (0.28)           | 0.71 (0.19)            | 0.11                              |
|         | α3        | 486 (373)             | 387 (180)              | 0.45                              |         | 0.14 (0.11)           | 0.17 (0.10)            | 0.52                              |
|         | preβ      | 1.2 (1.1)             | 1.5 (1.3)              | 0.72                              |         | 0.0006 (0.0007)       | 0.0005 (0.0004)        | 0.67                              |
|         | total HDL | 1013 (366)            | 1134 (370)             | 0.012                             |         | 5.7 (1.6)             | 6.3 (2.2)              | 0.21                              |
| ApoC3   | α0        | 13 (13)               | 12 (5)                 | 0.93                              | ApoM    | 2.8 (2.0)             | 2.1 (1.0)              | 0.24                              |
|         | α1        | 31 (23)               | 36 (25)                | 0.79                              |         | 34 (40)               | 19 (15)                | 0.20                              |
|         | α2        | 68 (60)               | 99 (64)                | 0.45                              |         | 47 (70)               | 26 (26)                | 0.37                              |
|         | α3        | 174 (88)              | 202 (84)               | 0.19                              |         | 1.1 (0.9)             | 1.0 (0.8)              | 0.058                             |
|         | preβ      | 48 (51)               | 71 (116)               | 0.52                              |         | 0.031 (0.043)         | 0.018 (0.008)          | 0.43                              |
|         | total HDL | 333 (111)             | 419 (100)              | 0.056                             |         | 85 (110)              | 48 (38)                | 0.29                              |
| ApoE    | α0        | 24 (16)               | 34 (14)                | 0.079                             | LCAT    | 0.64 (0.35)           | 0.53 (0.32)            | 0.59                              |
|         | α1        | 71 (20)               | 82 (24)                | 0.48                              |         | 0.73 (0.28)           | 0.60 (0.28)            | 0.39                              |
|         | α2        | 112 (46)              | 131 (32)               | 0.37                              |         | 1.7 (0.6)             | 1.3 (0.4)              | 0.46                              |
|         | α3        | 72 (65)               | 71 (47)                | 0.97                              |         | 8.9 (3.6)             | 7.3 (1.9)              | 0.45                              |
|         | preβ      | 1.7 (1.1)             | 1.7 (1.0)              | 0.92                              |         | 1.4 (1.6)             | 0.78 (0.38)            | 0.33                              |
|         | total HDL | 280 (89)              | 320 (81)               | 0.14                              |         | 13 (4.8)              | 11 (3)                 | 0.35                              |

**Supplemental Table III. Pool sizes for 8 HDL proteins across 5 HDL sizes.** Protein pool size (mg of protein in a given plasma pool) was measured in participants #1-6 on both diets. Mean (SD) for each protein across the size fractions and on total HDL (sum of 5 HDL sizes) are shown. Values between diets were compared by two-tailed, paired *t*-test.

| Protein     | HDL Size                | Participant #           | FCR (pools/day)       |                        | Production rate (mg/kg/day) |                            | Pool size (mg)            |                   |
|-------------|-------------------------|-------------------------|-----------------------|------------------------|-----------------------------|----------------------------|---------------------------|-------------------|
|             |                         |                         | High Fat              | High Carb              | High Fat                    | High Carb                  | High Fat                  | High Carb         |
| ApoA1       | $\alpha 0$              | 1                       | 1.86                  | 2.93                   | 0.88                        | 0.40                       | 42.43                     | 11.96             |
|             |                         | 2                       | 6.90                  | 11.42                  | 2.48                        | 3.09                       | 39.48                     | 29.15             |
|             |                         | 3                       | 0.36                  | 3.23                   | 0.11                        | 0.17                       | 28.50                     | 4.61              |
|             |                         | 4                       | 7.07                  | 15.69                  | 2.73                        | 6.55                       | 33.97                     | 37.35             |
|             |                         | 5                       | 0.13                  | 0.17                   | 0.03                        | 0.09                       | 14.42                     | 37.50             |
|             |                         | 6                       | 4.07                  | 5.32                   | 1.25                        | 2.38                       | 25.71                     | 37.52             |
|             |                         | mean<br>(SD)<br>P-value | 3.40<br>3.11<br>0.063 | 6.46<br>5.89           | 1.25<br>1.15<br>0.23        | 2.11<br>2.51               | 30.75<br>10.20<br>0.63    | 26.35<br>14.54    |
|             | $\alpha 1$              | 1                       | 0.89                  | 1.90                   | 6.16                        | 4.93                       | 618.62                    | 225.60            |
|             |                         | 2                       | 1.35                  | 6.40                   | 6.58                        | 16.07                      | 534.35                    | 270.46            |
|             |                         | 3                       | 0.73                  | 2.86                   | 3.55                        | 2.09                       | 442.37                    | 65.73             |
|             |                         | 4                       | 0.69                  | 1.89                   | 2.10                        | 6.55                       | 267.08                    | 310.28            |
|             |                         | 5                       | 0.17                  | 0.48                   | 2.32                        | 6.28                       | 1003.97                   | 941.73            |
|             |                         | 6                       | 0.85                  | 0.90                   | 6.37                        | 4.07                       | 625.18                    | 380.75            |
|             |                         | mean<br>(SD)<br>P-value | 0.78<br>0.38<br>0.082 | 2.41<br>2.13           | 4.51<br>2.10<br>0.31        | 6.66<br>4.89               | 581.93<br>245.85<br>0.029 | 365.76<br>301.26  |
|             | $\alpha 2$              | 1                       | 0.85                  | 1.69                   | 17.41                       | 22.08                      | 1821.00                   | 1137.22           |
|             |                         | 2                       | 0.50                  | 0.51                   | 12.40                       | 9.92                       | 2712.38                   | 2111.04           |
|             |                         | 3                       | 0.51                  | 1.79                   | 9.27                        | 18.76                      | 1644.87                   | 943.60            |
|             |                         | 4                       | 1.17                  | 0.67                   | 13.81                       | 18.50                      | 1036.71                   | 2481.62           |
|             |                         | 5                       | 0.37                  | 0.50                   | 15.07                       | 15.26                      | 3000.81                   | 2206.70           |
|             |                         | 6                       | 0.32                  | 0.68                   | 9.22                        | 23.79                      | 2381.48                   | 2934.03           |
|             |                         | mean<br>(SD)<br>P-value | 0.62<br>0.33<br>0.23  | 0.97<br>0.60           | 12.86<br>3.25<br>0.095      | 18.05<br>4.98              | 2099.54<br>732.29<br>0.74 | 1969.03<br>776.41 |
| $\alpha 3$  | 1                       | 0.57                    | 0.62                  | 8.76                   | 14.76                       | 1378.54                    | 2081.78                   |                   |
|             | 2                       | 0.33                    | 0.52                  | 7.37                   | 14.80                       | 2426.46                    | 3050.72                   |                   |
|             | 3                       | 0.62                    | 0.60                  | 8.66                   | 15.32                       | 1274.47                    | 2302.64                   |                   |
|             | 4                       | 0.31                    | 0.51                  | 12.59                  | 11.60                       | 3610.98                    | 2051.38                   |                   |
|             | 5                       | 0.19                    | 0.47                  | 5.85                   | 12.72                       | 2296.11                    | 1956.53                   |                   |
|             | 6                       | 0.23                    | 0.38                  | 4.20                   | 8.77                        | 1525.59                    | 1913.03                   |                   |
|             | mean<br>(SD)<br>P-value | 0.37<br>0.18<br>0.024   | 0.52<br>0.09          | 7.90<br>2.88<br>0.011  | 12.99<br>2.52               | 2085.36<br>889.80<br>0.73  | 2226.01<br>426.12         |                   |
| pre $\beta$ | 1                       | 4.91                    | 13.59                 | 10.61                  | 4.58                        | 192.23                     | 29.37                     |                   |
|             | 2                       | 7.28                    | 22.87                 | 7.23                   | 18.21                       | 109.13                     | 85.83                     |                   |
|             | 3                       | 3.59                    | 20.34                 | 1.21                   | 6.28                        | 30.83                      | 27.81                     |                   |
|             | 4                       | 24.93                   | 16.90                 | 14.89                  | 12.91                       | 52.46                      | 68.36                     |                   |
|             | 5                       | 9.21                    | 16.00                 | 6.26                   | 6.23                        | 49.74                      | 28.29                     |                   |
|             | 6                       | 4.52                    | 9.75                  | 4.74                   | 9.59                        | 87.73                      | 82.55                     |                   |
|             | mean<br>(SD)<br>P-value | 9.07<br>8.04<br>0.095   | 16.57<br>4.68         | 7.49<br>4.76<br>0.43   | 9.63<br>5.15                | 87.02<br>58.82<br>0.27     | 53.70<br>28.24            |                   |
| system      | 1                       | 0.74                    | 0.68                  | 33.50                  | 27.41                       | 4052.83                    | 3485.92                   |                   |
|             | 2                       | 0.41                    | 0.58                  | 21.46                  | 30.06                       | 5821.80                    | 5547.20                   |                   |
|             | 3                       | 0.56                    | 0.70                  | 21.14                  | 25.95                       | 3421.04                    | 3344.39                   |                   |
|             | 4                       | 0.33                    | 0.57                  | 18.65                  | 31.59                       | 5001.20                    | 4948.99                   |                   |
|             | 5                       | 0.21                    | 0.48                  | 18.17                  | 34.07                       | 6365.05                    | 5170.75                   |                   |
|             | 6                       | 0.30                    | 0.47                  | 16.83                  | 30.23                       | 4645.69                    | 5347.87                   |                   |
|             | mean<br>(SD)<br>P-value | 0.42<br>0.19<br>0.019   | 0.58<br>0.10          | 21.63<br>6.08<br>0.054 | 29.89<br>2.90               | 4884.60<br>1093.12<br>0.39 | 4640.85<br>970.75         |                   |

Supplemental Table IV. Kinetic parameters of 8 HDL proteins across 5 HDL sizes (page 1/4).

| Protein | HDL Size                | Participant #           | FCR (pools/day)       |                       | Production rate (mg/kg/day) |                            | Pool size (mg)           |                  |
|---------|-------------------------|-------------------------|-----------------------|-----------------------|-----------------------------|----------------------------|--------------------------|------------------|
|         |                         |                         | High Fat              | High Carb             | High Fat                    | High Carb                  | High Fat                 | High Carb        |
| ApoA2   | α1                      | 1                       | 0.51                  | 0.51                  | 0.58                        | 0.41                       | 99.91                    | 70.00            |
|         |                         | 2                       | 0.24                  | 0.54                  | 0.04                        | 1.03                       | 18.58                    | 205.92           |
|         |                         | 3                       | 0.55                  | 0.58                  | 0.38                        | 0.33                       | 64.21                    | 51.59            |
|         |                         | 4                       | 0.37                  | 0.41                  | 0.30                        | 0.30                       | 71.18                    | 65.14            |
|         |                         | 5                       | 0.33                  | 0.52                  | 0.06                        | 1.04                       | 13.13                    | 147.33           |
|         |                         | 6                       | 0.49                  | 0.90                  | 0.43                        | 0.35                       | 72.73                    | 32.50            |
|         |                         | mean<br>(SD)<br>P-value | 0.41<br>0.12<br>0.062 | 0.58<br>0.17          | 0.30<br>0.21<br>0.27        | 0.58<br>0.36               | 56.62<br>33.89<br>0.37   | 95.41<br>66.86   |
|         | α2                      | 1                       | 0.74                  | 1.24                  | 3.40                        | 5.83                       | 408.32                   | 410.26           |
|         |                         | 2                       | 0.31                  | 1.09                  | 2.10                        | 6.63                       | 736.25                   | 653.93           |
|         |                         | 3                       | 0.66                  | 0.54                  | 2.99                        | 2.78                       | 411.78                   | 464.61           |
|         |                         | 4                       | 0.38                  | 0.52                  | 1.34                        | 6.44                       | 306.53                   | 1099.48          |
|         |                         | 5                       | 0.40                  | 0.54                  | 2.92                        | 5.02                       | 538.39                   | 675.77           |
|         |                         | 6                       | 0.80                  | 1.04                  | 3.76                        | 7.13                       | 390.06                   | 575.56           |
|         |                         | mean<br>(SD)<br>P-value | 0.55<br>0.21<br>0.083 | 0.83<br>0.33          | 2.75<br>0.89<br>0.014       | 5.64<br>1.58               | 465.22<br>152.14<br>0.22 | 646.60<br>244.96 |
|         | α3                      | 1                       | 0.54                  | 0.64                  | 1.46                        | 2.37                       | 241.56                   | 322.57           |
|         |                         | 2                       | 0.22                  | 0.50                  | 1.30                        | 3.21                       | 647.01                   | 689.67           |
|         |                         | 3                       | 0.61                  | 0.64                  | 2.23                        | 2.63                       | 331.31                   | 368.09           |
|         |                         | 4                       | 0.33                  | 0.50                  | 4.36                        | 2.64                       | 1173.37                  | 475.96           |
|         |                         | 5                       | 0.36                  | 0.41                  | 0.88                        | 0.92                       | 177.25                   | 162.12           |
|         |                         | 6                       | 0.45                  | 0.68                  | 1.88                        | 2.44                       | 345.94                   | 302.04           |
|         |                         | mean<br>(SD)<br>P-value | 0.42<br>0.14<br>0.016 | 0.56<br>0.11          | 2.02<br>1.24<br>0.51        | 2.37<br>0.77               | 486.07<br>373.37<br>0.45 | 386.74<br>179.90 |
| system  | 1                       | 0.64                    | 0.68                  | 5.43                  | 6.24                        | 749.79                     | 802.83                   |                  |
|         | 2                       | 0.27                    | 0.53                  | 3.45                  | 7.66                        | 1401.84                    | 1549.52                  |                  |
|         | 3                       | 0.63                    | 0.58                  | 5.61                  | 5.75                        | 807.29                     | 884.29                   |                  |
|         | 4                       | 0.34                    | 0.44                  | 6.00                  | 8.01                        | 1551.07                    | 1640.58                  |                  |
|         | 5                       | 0.39                    | 0.45                  | 3.85                  | 6.07                        | 728.77                     | 985.22                   |                  |
|         | 6                       | 0.43                    | 0.69                  | 4.19                  | 7.48                        | 808.73                     | 910.09                   |                  |
|         | mean<br>(SD)<br>P-value | 0.45<br>0.15<br>0.083   | 0.56<br>0.11          | 4.75<br>1.06<br>0.019 | 6.87<br>0.96                | 1007.91<br>367.33<br>0.010 | 1128.75<br>366.99        |                  |
| ApoC3   | α3                      | 1                       | 4.21                  | 3.79                  | 4.17                        | 6.03                       | 87.98                    | 138.58           |
|         |                         | 2                       | 1.06                  | 1.77                  | 1.39                        | 2.58                       | 144.49                   | 157.71           |
|         |                         | 3                       | 1.16                  | 0.98                  | 3.72                        | 3.80                       | 290.86                   | 350.04           |
|         |                         | 4                       | 0.23                  | 0.88                  | 0.70                        | 2.15                       | 272.00                   | 218.43           |
|         |                         | 5                       | 2.21                  | 2.50                  | 2.69                        | 4.12                       | 89.10                    | 119.73           |
|         |                         | 6                       | 2.85                  | 3.37                  | 5.46                        | 9.02                       | 160.05                   | 224.67           |
|         |                         | mean<br>(SD)<br>P-value | 1.95<br>1.44<br>0.23  | 2.21<br>1.22          | 3.02<br>1.79<br>0.018       | 4.62<br>2.55               | 174.08<br>88.24<br>0.19  | 201.53<br>84.20  |
| ApoE    | α0                      | 1                       | 22.50                 | 6.36                  | 8.17                        | 2.25                       | 32.31                    | 30.77            |
|         |                         | 2                       | 3.82                  | 4.43                  | 0.67                        | 1.05                       | 19.35                    | 25.44            |
|         |                         | 3                       | 6.75                  | 4.09                  | 3.43                        | 2.02                       | 46.15                    | 44.33            |
|         |                         | 4                       | 15.54                 | 39.96                 | 5.84                        | 25.83                      | 33.00                    | 57.85            |
|         |                         | 5                       | 4.05                  | 5.68                  | 0.37                        | 1.81                       | 6.63                     | 23.15            |
|         |                         | 6                       | 16.74                 | 5.54                  | 1.72                        | 1.41                       | 8.56                     | 21.30            |
|         |                         | mean<br>(SD)<br>P-value | 11.57<br>7.77<br>0.93 | 11.01<br>14.21        | 3.36<br>3.10<br>0.55        | 5.73<br>9.86               | 24.33<br>15.50<br>0.079  | 33.81<br>14.41   |

Supplemental Table IV. Kinetic parameters of 8 HDL proteins across 5 HDL sizes (page 2/4).

| Protein | HDL Size | Participant # | FCR (pools/day) |           | Production rate (mg/kg/day) |           | Pool size (mg) |           |
|---------|----------|---------------|-----------------|-----------|-----------------------------|-----------|----------------|-----------|
|         |          |               | High Fat        | High Carb | High Fat                    | High Carb | High Fat       | High Carb |
| α1      |          | 1             | 4.79            | 4.66      | 4.76                        | 3.45      | 88.50          | 64.52     |
|         |          | 2             | 3.29            | 7.23      | 2.32                        | 5.59      | 77.53          | 83.33     |
|         |          | 3             | 1.89            | 4.20      | 1.99                        | 3.09      | 95.65          | 66.17     |
|         |          | 4             | 3.36            | 5.50      | 1.89                        | 6.79      | 49.25          | 110.43    |
|         |          | 5             | 2.23            | 3.35      | 1.98                        | 5.13      | 65.12          | 111.34    |
|         |          | 6             | 6.00            | 6.50      | 3.53                        | 4.49      | 49.17          | 58.00     |
|         | mean     |               | 3.59            | 5.24      | 2.74                        | 4.76      | 70.87          | 82.30     |
|         | (SD)     |               | 1.56            | 1.46      | 1.16                        | 1.38      | 19.70          | 23.67     |
|         | P-value  |               | 0.040           |           | 0.075                       |           | 0.48           |           |
|         | α2       |               | 1               | 7.51      | 20.38                       | 8.07      | 22.60          | 95.73     |
| 2       |          |               | 6.70            | 6.84      | 11.12                       | 7.94      | 182.30         | 125.18    |
| 3       |          |               | 1.89            | 7.21      | 2.22                        | 12.01     | 106.86         | 149.86    |
| 4       |          |               | 6.43            | 6.16      | 5.94                        | 11.51     | 81.09          | 167.22    |
| 5       |          |               | 12.36           | 9.33      | 9.60                        | 11.77     | 56.81          | 91.64     |
| 6       |          |               | 5.87            | 8.36      | 10.38                       | 15.47     | 147.65         | 155.42    |
| mean    |          |               | 6.79            | 9.71      | 7.89                        | 13.55     | 111.74         | 130.98    |
| (SD)    |          |               | 3.36            | 5.35      | 3.33                        | 5.03      | 45.84          | 31.73     |
| P-value |          |               | 0.26            |           | 0.072                       |           | 0.37           |           |
| α3      |          |               | 1               | 11.12     | 14.01                       | 4.97      | 8.00           | 39.78     |
|         | 2        |               | 8.56            | 9.95      | 10.17                       | 13.81     | 130.59         | 149.61    |
|         | 3        |               | 7.04            | 7.84      | 2.98                        | 4.37      | 38.51          | 50.13     |
|         | 4        |               | 3.97            | 10.09     | 7.91                        | 12.29     | 175.15         | 108.98    |
|         | 5        |               | 10.33           | 10.93     | 4.79                        | 4.74      | 33.93          | 31.51     |
|         | 6        |               | 8.36            | 10.82     | 1.16                        | 4.68      | 11.58          | 36.32     |
|         | mean     |               | 8.23            | 10.61     | 5.33                        | 7.98      | 71.59          | 71.05     |
|         | (SD)     |               | 2.55            | 2.00      | 3.27                        | 4.17      | 65.32          | 47.48     |
|         | P-value  |               | 0.036           |           | 0.011                       |           | 0.97           |           |
|         | system   |               | 1               | 7.23      | 10.20                       | 20.82     | 28.30          | 256.31    |
| 2       |          |               | 6.51            | 6.65      | 24.27                       | 23.68     | 409.77         | 383.56    |
| 3       |          |               | 2.81            | 5.40      | 8.88                        | 18.62     | 287.17         | 310.50    |
| 4       |          |               | 4.54            | 6.57      | 17.49                       | 32.62     | 338.49         | 444.48    |
| 5       |          |               | 5.38            | 6.61      | 11.95                       | 23.45     | 162.49         | 257.64    |
| 6       |          |               | 6.02            | 8.07      | 15.63                       | 26.05     | 216.96         | 271.05    |
| mean    |          |               | 5.41            | 7.25      | 16.51                       | 25.45     | 278.53         | 318.14    |
| (SD)    |          |               | 1.57            | 1.68      | 5.65                        | 4.77      | 87.91          | 80.05     |
| P-value |          |               | 0.0069          |           | 0.0091                      |           | 0.14           |           |
| ApoJ    |          | α0            | 1               | 2.03      | 1.96                        | 1.63      | 2.34           | 71.36     |
|         | 2        |               | 1.75            | 1.83      | 1.30                        | 1.87      | 81.61          | 110.01    |
|         | 3        |               | 1.97            | 2.17      | 1.86                        | 2.35      | 85.53          | 97.36     |
|         | 4        |               | 0.31            | 1.08      | 0.60                        | 2.87      | 171.10         | 237.50    |
|         | 5        |               | 1.47            | 1.52      | 1.06                        | 2.15      | 52.57          | 103.12    |
|         | 6        |               | 1.36            | 2.35      | 0.86                        | 2.15      | 52.38          | 76.92     |
|         | mean     |               | 1.48            | 1.82      | 1.22                        | 2.29      | 85.76          | 121.49    |
|         | (SD)     |               | 0.63            | 0.46      | 0.47                        | 0.34      | 44.10          | 57.97     |
|         | P-value  |               | 0.12            |           | 0.011                       |           | 0.0070         |           |
|         | ApoL1    | α0            | 1               | 1.04      | 1.27                        | 0.0050    | 0.0067         | 0.43      |
| 2       |          |               | 0.19            | 0.49      | 0.0008                      | 0.0021    | 0.49           | 0.47      |
| 3       |          |               | 0.47            | 2.25      | 0.0011                      | 0.0045    | 0.22           | 0.18      |
| 4       |          |               | 0.28            | 0.79      | 0.0046                      | 0.0082    | 1.44           | 0.93      |
| 5       |          |               | 0.35            | 0.60      | 0.0009                      | 0.0063    | 0.18           | 0.76      |
| 6       |          |               | 1.38            | 1.39      | 0.0028                      | 0.0070    | 0.17           | 0.42      |
| mean    |          |               | 0.62            | 1.13      | 0.0025                      | 0.0058    | 0.49           | 0.54      |
| (SD)    |          |               | 0.48            | 0.66      | 0.0019                      | 0.0022    | 0.49           | 0.27      |
| P-value |          |               | 0.11            |           | 0.0035                      |           | 0.76           |           |

Supplemental Table IV. Kinetic parameters of 8 HDL proteins across 5 HDL sizes (page 3/4).

| Protein | HDL Size | Participant # | FCR (pools/day) |           | Production rate (mg/kg/day) |           | Pool size (mg) |           |
|---------|----------|---------------|-----------------|-----------|-----------------------------|-----------|----------------|-----------|
|         |          |               | High Fat        | High Carb | High Fat                    | High Carb | High Fat       | High Carb |
|         | α1       | 1             | 1.93            | 1.35      | 0.064                       | 0.049     | 2.96           | 3.14      |
|         |          | 2             | 0.36            | 0.63      | 0.021                       | 0.049     | 6.57           | 8.38      |
|         |          | 3             | 1.29            | 1.25      | 0.047                       | 0.044     | 3.33           | 3.19      |
|         |          | 4             | 0.38            | 1.23      | 0.018                       | 0.068     | 4.08           | 4.94      |
|         |          | 5             | 0.60            | 0.62      | 0.041                       | 0.045     | 5.04           | 5.20      |
|         |          | 6             | 0.53            | 0.53      | 0.022                       | 0.027     | 3.46           | 4.23      |
|         | mean     | 0.85          | 0.94            | 0.036     | 0.047                       | 4.24      | 4.85           |           |
|         | (SD)     | 0.63          | 0.38            | 0.018     | 0.013                       | 1.35      | 1.93           |           |
|         | P-value  | 0.66          |                 | 0.30      |                             | 0.089     |                |           |
|         | system   | 1             | 1.82            | 1.34      | 0.069                       | 0.056     | 3.39           | 3.60      |
|         |          | 2             | 0.34            | 0.63      | 0.022                       | 0.051     | 7.06           | 8.85      |
|         |          | 3             | 1.24            | 1.21      | 0.048                       | 0.045     | 3.55           | 3.37      |
|         |          | 4             | 0.35            | 1.16      | 0.022                       | 0.076     | 5.52           | 5.87      |
| 5       |          | 0.59          | 0.62            | 0.042     | 0.051                       | 5.22      | 5.96           |           |
| 6       |          | 0.53          | 0.51            | 0.023     | 0.028                       | 3.63      | 4.65           |           |
| mean    | 0.81     | 0.91          | 0.04            | 0.05      | 4.73                        | 5.38      |                |           |
| (SD)    | 0.59     | 0.36          | 0.02            | 0.02      | 1.46                        | 2.02      |                |           |
| P-value | 0.59     |               | 0.24            |           | 0.069                       |           |                |           |
| ApoM    | α1       | 1             | 0.54            | 0.98      | 0.10                        | 0.12      | 15.73          | 10.49     |
|         |          | 2             | 0.36            | 0.50      | 0.36                        | 0.21      | 110.12         | 45.50     |
|         |          | 3             | 0.46            | 0.58      | 0.06                        | 0.08      | 12.42          | 12.81     |
|         |          | 4             | 0.18            | 0.36      | 0.02                        | 0.03      | 9.20           | 8.40      |
|         |          | 5             | 0.43            | 0.33      | 0.29                        | 0.10      | 48.57          | 23.35     |
|         |          | 6             | 0.34            | 0.55      | 0.03                        | 0.06      | 7.64           | 8.46      |
|         | mean     | 0.38          | 0.55            | 0.14      | 0.10                        | 33.95     | 18.17          |           |
|         | (SD)     | 0.13          | 0.23            | 0.15      | 0.06                        | 40.29     | 14.50          |           |
|         | P-value  | 0.071         |                 | 0.34      |                             | 0.20      |                |           |
|         | α2       | 1             | 0.39            | 0.68      | 0.06                        | 0.04      | 14.06          | 5.51      |
|         |          | 2             | 0.36            | 0.50      | 0.62                        | 0.31      | 187.22         | 66.17     |
|         |          | 3             | 0.51            | 0.58      | 0.24                        | 0.33      | 42.73          | 51.63     |
|         |          | 4             | 0.16            | 0.45      | 0.02                        | 0.07      | 10.02          | 13.96     |
| 5       |          | 0.29          | 0.23            | 0.06      | 0.02                        | 16.20     | 6.17           |           |
| 6       |          | 0.30          | 0.72            | 0.04      | 0.14                        | 10.44     | 15.95          |           |
| mean    | 0.33     | 0.53          | 0.17            | 0.15      | 46.78                       | 26.56     |                |           |
| (SD)    | 0.12     | 0.18          | 0.23            | 0.14      | 69.88                       | 25.80     |                |           |
| P-value | 0.045    |               | 0.73            |           | 0.37                        |           |                |           |
| system  | 1        | 0.47          | 0.88            | 0.157     | 0.161                       | 29.79     | 16.00          |           |
|         | 2        | 0.36          | 0.50            | 0.985     | 0.517                       | 297.35    | 111.67         |           |
|         | 3        | 0.50          | 0.58            | 0.303     | 0.412                       | 55.15     | 64.43          |           |
|         | 4        | 0.17          | 0.41            | 0.036     | 0.103                       | 19.23     | 22.36          |           |
|         | 5        | 0.39          | 0.31            | 0.349     | 0.124                       | 64.77     | 29.52          |           |
|         | 6        | 0.32          | 0.66            | 0.068     | 0.192                       | 18.09     | 24.41          |           |
| mean    | 0.37     | 0.56          | 0.32            | 0.25      | 80.73                       | 44.73     |                |           |
| (SD)    | 0.12     | 0.20          | 0.35            | 0.17      | 107.83                      | 36.99     |                |           |
| P-value | 0.055    |               | 0.53            |           | 0.29                        |           |                |           |
| LCAT    | α3       | 1             | 3.11            | 2.33      | 0.50                        | 0.17      | 14.20          | 6.52      |
|         |          | 2             | 0.36            | 0.65      | 0.02                        | 0.05      | 5.41           | 8.77      |
|         |          | 3             | 0.86            | -         | 0.12                        | -         | 12.58          | -         |
|         |          | 4             | 0.51            | 0.53      | 0.05                        | 0.05      | 8.07           | 8.67      |
|         |          | 5             | 0.74            | 0.66      | 0.06                        | 0.05      | 6.15           | 5.76      |
|         |          | 6             | 0.25            | 0.36      | 0.02                        | 0.04      | 7.08           | 9.17      |
|         | mean     | 0.97          | 0.91            | 0.13      | 0.07                        | 8.92      | 7.78           |           |
|         | (SD)     | 1.07          | 0.80            | 0.18      | 0.06                        | 3.62      | 1.53           |           |
| P-value | 0.65     |               | 0.46            |           | 0.84                        |           |                |           |

**Supplemental Table IV. Kinetic parameters of 8 HDL proteins across 5 HDL sizes (page 4/4).** Values were compared between diets by two-tailed, paired *t*-test. FCR, fractional catabolic rate.

| Gene Name   | UniProt Entry #     | Protein Name                                         | # of Datasets | Participant in which each protein was identified |   |   |   |   |   |   |   |   |    |    |    | Set # | Group # & HDL size |                              |
|-------------|---------------------|------------------------------------------------------|---------------|--------------------------------------------------|---|---|---|---|---|---|---|---|----|----|----|-------|--------------------|------------------------------|
|             |                     |                                                      |               | 1                                                | 2 | 3 | 4 | 5 | 6 | 7 | 8 | 9 | 10 | 11 | 12 |       |                    |                              |
| CFH         | P08603              | Complement factor H                                  | 24            |                                                  |   |   |   |   |   |   |   |   |    |    |    |       | 1                  | I - $\alpha$ 0               |
| A2M         | P01023              | Alpha-2-macroglobulin                                | 24            |                                                  |   |   |   |   |   |   |   |   |    |    |    |       | 1                  | I - $\alpha$ 0               |
| IGHM        | P01871-2            | Isoform 2 of Ig mu chain C region                    | 24            |                                                  |   |   |   |   |   |   |   |   |    |    |    |       | 1                  | I - $\alpha$ 0               |
| FN1         | P02751              | Fibronectin                                          | 24            |                                                  |   |   |   |   |   |   |   |   |    |    |    |       | 1                  | I - $\alpha$ 0               |
| APOB        | P04114              | Apolipoprotein B-100                                 | 24            |                                                  |   |   |   |   |   |   |   |   |    |    |    |       | 1                  | I - $\alpha$ 0               |
| C1QC        | P02747              | Complement C1q subcomponent subunit C                | 24            |                                                  |   |   |   |   |   |   |   |   |    |    |    |       | 1                  | I - $\alpha$ 0               |
| LGALS3BP    | Q08380              | Galectin-3-binding protein                           | 24            |                                                  |   |   |   |   |   |   |   |   |    |    |    |       | 1                  | I - $\alpha$ 0               |
| CLU / APOJ  | P10909-2            | Clusterin                                            | 24            |                                                  |   |   |   |   |   |   |   |   |    |    |    |       | 1                  | I - $\alpha$ 0               |
| FGB         | P02675              | Fibrinogen beta chain                                | 24            |                                                  |   |   |   |   |   |   |   |   |    |    |    |       | 1                  | I - $\alpha$ 0               |
| FGG         | C9JC84              | Fibrinogen gamma chain                               | 24            |                                                  |   |   |   |   |   |   |   |   |    |    |    |       | 1                  | I - $\alpha$ 0               |
| IGLC2       | POCG05              | Ig lambda-2 chain C regions                          | 24            |                                                  |   |   |   |   |   |   |   |   |    |    |    |       | 1                  | I - $\alpha$ 0               |
| FGA         | P02671              | Fibrinogen alpha chain                               | 24            |                                                  |   |   |   |   |   |   |   |   |    |    |    |       | 1                  | I - $\alpha$ 0               |
| HP          | P00738              | Haptoglobin                                          | 24            |                                                  |   |   |   |   |   |   |   |   |    |    |    |       | 1                  | I - $\alpha$ 0               |
| HBB         | P68871              | Hemoglobin subunit beta                              | 24            |                                                  |   |   |   |   |   |   |   |   |    |    |    |       | 1                  | I - $\alpha$ 0               |
| C1R         | P00736              | Complement C1r subcomponent                          | 24            |                                                  |   |   |   |   |   |   |   |   |    |    |    |       | 1                  | II - $\alpha$ 1,2            |
| APOL1       | O14791-2            | Apolipoprotein L1                                    | 24            |                                                  |   |   |   |   |   |   |   |   |    |    |    |       | 1                  | II - $\alpha$ 1,2            |
| PLTP        | B3KUE5              | Phospholipid transfer protein                        | 24            |                                                  |   |   |   |   |   |   |   |   |    |    |    |       | 1                  | II - $\alpha$ 1,2            |
| APOM        | O95445              | Apolipoprotein M                                     | 24            |                                                  |   |   |   |   |   |   |   |   |    |    |    |       | 1                  | II - $\alpha$ 1,2            |
| APOE        | P02649              | Apolipoprotein E                                     | 24            |                                                  |   |   |   |   |   |   |   |   |    |    |    |       | 1                  | II - $\alpha$ 1,2            |
| GPLD1       | P80108              | Phosphatidylinositol-glycan-specific phospholipase D | 24            |                                                  |   |   |   |   |   |   |   |   |    |    |    |       | 1                  | II - $\alpha$ 1,2            |
| ITIH2       | P19823              | Inter-alpha-trypsin inhibitor heavy chain H2         | 24            |                                                  |   |   |   |   |   |   |   |   |    |    |    |       | 1                  | II - $\alpha$ 1,2            |
| CETP        | P11597              | Cholesteryl ester transfer protein                   | 24            |                                                  |   |   |   |   |   |   |   |   |    |    |    |       | 1                  | II - $\alpha$ 1,2            |
| SAA4        | P35542              | Serum amyloid A-4 protein                            | 24            |                                                  |   |   |   |   |   |   |   |   |    |    |    |       | 1                  | II - $\alpha$ 1,2            |
| C3          | P01024              | Complement C3                                        | 24            |                                                  |   |   |   |   |   |   |   |   |    |    |    |       | 1                  | II - $\alpha$ 1,2            |
| APOA2       | V9GYM3              | Apolipoprotein A-II                                  | 24            |                                                  |   |   |   |   |   |   |   |   |    |    |    |       | 1                  | II - $\alpha$ 1,2            |
| APCS        | P02743              | Serum amyloid P                                      | 24            |                                                  |   |   |   |   |   |   |   |   |    |    |    |       | 1                  | II - $\alpha$ 1,2            |
| CFI         | E7ETH0              | Complement factor I light chain                      | 24            |                                                  |   |   |   |   |   |   |   |   |    |    |    |       | 1                  | II - $\alpha$ 1,2            |
| TF          | P02787              | Serotransferrin                                      | 24            |                                                  |   |   |   |   |   |   |   |   |    |    |    |       | 1                  | III - $\alpha$ 2,3,p $\beta$ |
| PROS1       | P07225              | Vitamin K-dependent protein S                        | 24            |                                                  |   |   |   |   |   |   |   |   |    |    |    |       | 1                  | III - $\alpha$ 2,3,p $\beta$ |
| ITIH4       | Q14624              | Inter-alpha-trypsin inhibitor heavy chain H4         | 24            |                                                  |   |   |   |   |   |   |   |   |    |    |    |       | 1                  | III - $\alpha$ 2,3,p $\beta$ |
| AGT         | P01019              | Angiotensinogen                                      | 24            |                                                  |   |   |   |   |   |   |   |   |    |    |    |       | 1                  | III - $\alpha$ 2,3,p $\beta$ |
| APOA1       | P02647              | Apolipoprotein A-I                                   | 24            |                                                  |   |   |   |   |   |   |   |   |    |    |    |       | 1                  | III - $\alpha$ 2,3,p $\beta$ |
| APOC4-APOC2 | K7ER74              | Protein APOC4-APOC2                                  | 24            |                                                  |   |   |   |   |   |   |   |   |    |    |    |       | 1                  | III - $\alpha$ 2,3,p $\beta$ |
| C4B         | POCOL5              | Complement C4-B                                      | 24            |                                                  |   |   |   |   |   |   |   |   |    |    |    |       | 1                  | III - $\alpha$ 2,3,p $\beta$ |
| VTN         | P04004              | Vitronectin                                          | 24            |                                                  |   |   |   |   |   |   |   |   |    |    |    |       | 1                  | III - $\alpha$ 2,3,p $\beta$ |
| SERPINA3    | P01011              | Alpha-1-antichymotrypsin                             | 24            |                                                  |   |   |   |   |   |   |   |   |    |    |    |       | 1                  | III - $\alpha$ 2,3,p $\beta$ |
| APOD        | C9JF17              | Apolipoprotein D                                     | 24            |                                                  |   |   |   |   |   |   |   |   |    |    |    |       | 1                  | III - $\alpha$ 2,3,p $\beta$ |
| PON1        | F5H4W9;<br>P27169   | Serum paraoxonase/arylesterase 1                     | 24            |                                                  |   |   |   |   |   |   |   |   |    |    |    |       | 1                  | III - $\alpha$ 2,3,p $\beta$ |
| APOC3       | B0YIW2              | Apolipoprotein C-III                                 | 24            |                                                  |   |   |   |   |   |   |   |   |    |    |    |       | 1                  | III - $\alpha$ 2,3,p $\beta$ |
| CNDP1       | Q96KN2              | Beta-Ala-His dipeptidase                             | 24            |                                                  |   |   |   |   |   |   |   |   |    |    |    |       | 1                  | III - $\alpha$ 2,3,p $\beta$ |
| LCAT        | P04180              | Phosphatidylcholine-sterol acyltransferase           | 24            |                                                  |   |   |   |   |   |   |   |   |    |    |    |       | 1                  | IV - $\alpha$ 3              |
| CDH5        | P33151              | Cadherin-5                                           | 24            |                                                  |   |   |   |   |   |   |   |   |    |    |    |       | 1                  | IV - $\alpha$ 3              |
| A1BG        | P04217              | Alpha-1B-glycoprotein                                | 24            |                                                  |   |   |   |   |   |   |   |   |    |    |    |       | 1                  | IV - $\alpha$ 3              |
| KNG1        | P01042-2;<br>P01042 | Kininogen-1                                          | 24            |                                                  |   |   |   |   |   |   |   |   |    |    |    |       | 1                  | IV - $\alpha$ 3              |
| HPX         | P02790              | Hemopexin                                            | 24            |                                                  |   |   |   |   |   |   |   |   |    |    |    |       | 1                  | IV - $\alpha$ 3              |
| SERPINC1    | P01008              | Antithrombin-III                                     | 24            |                                                  |   |   |   |   |   |   |   |   |    |    |    |       | 1                  | IV - $\alpha$ 3              |
| C1S         | P09871              | Complement C1s subcomponent                          | 24            |                                                  |   |   |   |   |   |   |   |   |    |    |    |       | 1                  | IV - $\alpha$ 3              |
| PLXDC2      | Q6UX71              | Plexin domain-containing protein 2                   | 24            |                                                  |   |   |   |   |   |   |   |   |    |    |    |       | 1                  | IV - $\alpha$ 3              |
| F5          | P12259              | Coagulation factor V                                 | 24            |                                                  |   |   |   |   |   |   |   |   |    |    |    |       | 1                  | V - p $\beta$                |
| AHSG        | C9JV77              | Alpha-2-HS-glycoprotein                              | 24            |                                                  |   |   |   |   |   |   |   |   |    |    |    |       | 1                  | V - p $\beta$                |
| SERPINA1    | P01009              | Alpha-1-antitrypsin                                  | 24            |                                                  |   |   |   |   |   |   |   |   |    |    |    |       | 1                  | V - p $\beta$                |
| ALB         | P02768              | Serum albumin                                        | 24            |                                                  |   |   |   |   |   |   |   |   |    |    |    |       | 1                  | V - p $\beta$                |
| APOA4       | P06727              | Apolipoprotein A-IV                                  | 24            |                                                  |   |   |   |   |   |   |   |   |    |    |    |       | 1                  | V - p $\beta$                |

**Supplemental Table V. HDL proteome distribution across HDL size (page 1/3).**

| Gene Name | UniProt Entry #     | Protein Name                                               | # of Datasets | Participant in which each protein was identified |   |   |   |   |   |   |   |   |    |    |    | Set # | Group # & HDL size |                           |
|-----------|---------------------|------------------------------------------------------------|---------------|--------------------------------------------------|---|---|---|---|---|---|---|---|----|----|----|-------|--------------------|---------------------------|
|           |                     |                                                            |               | 1                                                | 2 | 3 | 4 | 5 | 6 | 7 | 8 | 9 | 10 | 11 | 12 |       |                    |                           |
| IGJ       | P01591              | Immunoglobulin J chain                                     | 18            |                                                  |   |   |   |   |   |   |   |   |    |    |    |       | 2                  | I - $\alpha$ 0            |
| FCGBP     | Q9Y6R7              | IgGfc-binding protein                                      | 20            |                                                  |   |   |   |   |   |   |   |   |    |    |    |       | 2                  | I - $\alpha$ 0            |
| PLG       | P00747              | Plasminogen                                                | 22            |                                                  |   |   |   |   |   |   |   |   |    |    |    |       | 2                  | I - $\alpha$ 0            |
| IGHG1     | P01857              | Ig gamma-1 chain C region                                  | 22            |                                                  |   |   |   |   |   |   |   |   |    |    |    |       | 2                  | I - $\alpha$ 0            |
| C1QB      | P02746              | Complement C1q subcomponent subunit B                      | 12            |                                                  |   |   |   |   |   |   |   |   |    |    |    |       | 2                  | I - $\alpha$ 0            |
| IGHG2     | P01859              | Ig gamma-2 chain C region                                  | 14            |                                                  |   |   |   |   |   |   |   |   |    |    |    |       | 2                  | I - $\alpha$ 0            |
| P01623    | P01623              | Ig kappa chain V-III region WOL                            | 12            |                                                  |   |   |   |   |   |   |   |   |    |    |    |       | 2                  | I - $\alpha$ 0            |
| HBA1      | P69905              | Hemoglobin subunit alpha                                   | 22            |                                                  |   |   |   |   |   |   |   |   |    |    |    |       | 2                  | I - $\alpha$ 0            |
| SERPIND1  | P05546              | Heparin cofactor 2                                         | 12            |                                                  |   |   |   |   |   |   |   |   |    |    |    |       | 2                  | II - $\alpha$ 0,1         |
| C5        | P01031              | Complement C5                                              | 22            |                                                  |   |   |   |   |   |   |   |   |    |    |    |       | 2                  | II - $\alpha$ 0,1         |
| IGHG4     | P01861              | Ig gamma-4 chain C region                                  | 16            |                                                  |   |   |   |   |   |   |   |   |    |    |    |       | 2                  | II - $\alpha$ 0,1         |
| IGKC      | P01834              | Ig kappa chain C region                                    | 18            |                                                  |   |   |   |   |   |   |   |   |    |    |    |       | 2                  | II - $\alpha$ 0,1         |
| LBP       | P18428              | Lipopolysaccharide-binding protein                         | 12            |                                                  |   |   |   |   |   |   |   |   |    |    |    |       | 2                  | II - $\alpha$ 0,1         |
| HPR       | P00739-2            | Haptoglobin-related protein                                | 20            |                                                  |   |   |   |   |   |   |   |   |    |    |    |       | 2                  | II - $\alpha$ 0,1         |
| P01781    | P01781              | Ig heavy chain V-III region GAL                            | 13            |                                                  |   |   |   |   |   |   |   |   |    |    |    |       | 2                  | II - $\alpha$ 0,1         |
| KLKB1     | HOYAC1              | Plasma kallikrein heavy chain (Fragment)                   | 15            |                                                  |   |   |   |   |   |   |   |   |    |    |    |       | 2                  | II - $\alpha$ 0,1         |
| C8G       | P07360              | Complement component C8 gamma chain                        | 12            |                                                  |   |   |   |   |   |   |   |   |    |    |    |       | 2                  | II - $\alpha$ 0,1         |
| C8A       | P07357              | Complement component C8 alpha chain                        | 14            |                                                  |   |   |   |   |   |   |   |   |    |    |    |       | 2                  | II - $\alpha$ 0,1         |
| BPIFB1    | Q8TDL5              | BPI fold-containing family B member 1                      | 18            |                                                  |   |   |   |   |   |   |   |   |    |    |    |       | 2                  | II - $\alpha$ 0,1         |
| APOC1     | P02654              | Apolipoprotein C-I                                         | 18            |                                                  |   |   |   |   |   |   |   |   |    |    |    |       | 2                  | III - $\alpha$ 1,2,3      |
| SERPING1  | E9PGN7;<br>B4E1F0   | Plasma protease C1 inhibitor                               | 20            |                                                  |   |   |   |   |   |   |   |   |    |    |    |       | 2                  | III - $\alpha$ 1,2,3      |
| ITIH1     | P19827              | Inter-alpha-trypsin inhibitor heavy chain H1               | 15            |                                                  |   |   |   |   |   |   |   |   |    |    |    |       | 2                  | III - $\alpha$ 1,2,3      |
| CFB       | B4E1Z4              | Complement factor B                                        | 20            |                                                  |   |   |   |   |   |   |   |   |    |    |    |       | 2                  | III - $\alpha$ 1,2,3      |
| SAA1      | E9PQD6;<br>PODJ18   | Serum amyloid A protein                                    | 14            |                                                  |   |   |   |   |   |   |   |   |    |    |    |       | 2                  | III - $\alpha$ 1,2,3      |
| FBLN1     | P23142;<br>B1AHL2   | Fibulin-1                                                  | 18            |                                                  |   |   |   |   |   |   |   |   |    |    |    |       | 2                  | III - $\alpha$ 1,2,3      |
| PCYOX1    | Q9UHG3              | Preylcysteine oxidase 1                                    | 20            |                                                  |   |   |   |   |   |   |   |   |    |    |    |       | 2                  | III - $\alpha$ 1,2,3      |
| CPN2      | P22792              | Carboxypeptidase N subunit 2                               | 22            |                                                  |   |   |   |   |   |   |   |   |    |    |    |       | 2                  | III - $\alpha$ 1,2,3      |
| ITIH3     | Q06033              | Inter-alpha-trypsin inhibitor heavy chain H3               | 12            |                                                  |   |   |   |   |   |   |   |   |    |    |    |       | 2                  | IV - $\alpha$ 3           |
| EFEMP1    | Q12805              | EGF-containing fibulin-like extracellular matrix protein 1 | 16            |                                                  |   |   |   |   |   |   |   |   |    |    |    |       | 2                  | IV - $\alpha$ 3           |
| SERPINF2  | P08697              | Alpha-2-antiplasmin                                        | 18            |                                                  |   |   |   |   |   |   |   |   |    |    |    |       | 2                  | IV - $\alpha$ 3           |
| HRG       | P04196              | Histidine-rich glycoprotein                                | 22            |                                                  |   |   |   |   |   |   |   |   |    |    |    |       | 2                  | IV - $\alpha$ 3           |
| MASP1     | P48740-2            | Isoform 2 of Mannan-binding lectin serine protease 1       | 16            |                                                  |   |   |   |   |   |   |   |   |    |    |    |       | 2                  | IV - $\alpha$ 3           |
| CP        | P00450              | Ceruloplasmin                                              | 22            |                                                  |   |   |   |   |   |   |   |   |    |    |    |       | 2                  | IV - $\alpha$ 3           |
| C9        | P02748              | Complement component C9                                    | 20            |                                                  |   |   |   |   |   |   |   |   |    |    |    |       | 2                  | IV - $\alpha$ 3           |
| TTR       | P02766              | Transthyretin                                              | 16            |                                                  |   |   |   |   |   |   |   |   |    |    |    |       | 2                  | V - $\alpha$ 3, p $\beta$ |
| PON3      | Q15166              | Serum paraoxonase/lactonase 3                              | 22            |                                                  |   |   |   |   |   |   |   |   |    |    |    |       | 2                  | V - $\alpha$ 3, p $\beta$ |
| GC        | D6RF35;<br>P02774-3 | Vitamin D-binding protein                                  | 22            |                                                  |   |   |   |   |   |   |   |   |    |    |    |       | 2                  | V - $\alpha$ 3, p $\beta$ |
| GPX3      | P22352              | Glutathione peroxidase 3                                   | 16            |                                                  |   |   |   |   |   |   |   |   |    |    |    |       | 2                  | V - $\alpha$ 3, p $\beta$ |
| HSPA5     | P11021              | 78 kDa glucose-regulated protein                           | 21            |                                                  |   |   |   |   |   |   |   |   |    |    |    |       | 2                  | V - $\alpha$ 3, p $\beta$ |
| PROZ      | P22891-2            | Isoform 2 of Vitamin K-dependent protein Z                 | 14            |                                                  |   |   |   |   |   |   |   |   |    |    |    |       | 2                  | V - $\alpha$ 3, p $\beta$ |
| PROC      | P04070-2            | Isoform 2 of Vitamin K-dependent protein C                 | 18            |                                                  |   |   |   |   |   |   |   |   |    |    |    |       | 2                  | V - $\alpha$ 3, p $\beta$ |
| F9        | P00740              | Coagulation factor IX                                      | 20            |                                                  |   |   |   |   |   |   |   |   |    |    |    |       | 2                  | V - $\alpha$ 3, p $\beta$ |
| FBLN5     | G3XA98              | Fibulin 5, isoform CRA_a                                   | 18            |                                                  |   |   |   |   |   |   |   |   |    |    |    |       | 2                  | V - $\alpha$ 3, p $\beta$ |
| AZGP1     | P25311              | Zinc-alpha-2-glycoprotein                                  | 13            |                                                  |   |   |   |   |   |   |   |   |    |    |    |       | 2                  | V - $\alpha$ 3, p $\beta$ |

**Supplemental Table V. HDL proteome distribution across HDL size (page 2/3).**

| Gene Name | UniProt Entry # | Protein Name                                             | # of Datasets | Participant in which each protein was identified |   |   |   |   |   |   |   |   |    |    |    | Set # | Group # & HDL size |     |
|-----------|-----------------|----------------------------------------------------------|---------------|--------------------------------------------------|---|---|---|---|---|---|---|---|----|----|----|-------|--------------------|-----|
|           |                 |                                                          |               | 1                                                | 2 | 3 | 4 | 5 | 6 | 7 | 8 | 9 | 10 | 11 | 12 |       |                    |     |
| PZP       | P20742          | Pregnancy zone protein                                   | 8             |                                                  |   |   |   |   |   |   |   |   |    |    |    |       | 3                  | N/A |
| IGLL5     | B9A064          | Immunoglobulin lambda-like polypeptide 5                 | 10            |                                                  |   |   |   |   |   |   |   |   |    |    |    |       | 3                  |     |
| ORM1      | P02763          | Alpha-1-acid glycoprotein 1                              | 1             |                                                  | █ |   |   |   |   |   |   |   |    |    |    |       | 3                  |     |
| LRG1      | P02750          | Leucine-rich alpha-2-glycoprotein                        | 2             |                                                  |   |   |   |   |   |   |   |   |    |    |    |       | 3                  |     |
| AMBP      | P02760          | Protein AMBP                                             | 6             |                                                  |   |   |   |   |   |   |   |   |    |    |    |       | 3                  |     |
| TPM4      | P67936          | Tropomyosin alpha-4 chain                                | 1             |                                                  |   | █ |   |   |   |   |   |   |    |    |    |       | 3                  |     |
| MMP2      | P08253          | 72 kDa type IV collagenase                               | 1             |                                                  |   |   |   |   |   |   |   |   |    |    |    | █     | 3                  |     |
| SERPINA11 | Q86U17          | Serin A11                                                | 3             |                                                  |   |   |   |   |   |   |   |   |    |    |    | █     | 3                  |     |
| F11       | P03951          | Coagulation factor XI                                    | 1             | █                                                |   |   |   |   |   |   |   |   |    |    |    |       | 3                  |     |
| C1QA      | P02745          | Complement C1q subcomponent subunit A                    | 2             |                                                  |   |   |   |   |   |   |   |   |    |    |    |       | 3                  |     |
| PRG4      | Q92954          | Proteoglycan 4                                           | 2             |                                                  |   |   |   |   |   |   |   |   |    |    |    |       | 3                  |     |
| P01625    | P01625          | Ig kappa chain V-IV region Len                           | 4             |                                                  |   |   |   |   |   |   |   |   |    |    |    | █     | 3                  |     |
| ANTXR2    | P58335          | Anthrax toxin receptor 2                                 | 2             |                                                  |   |   |   |   |   |   |   |   |    |    |    |       | 3                  |     |
| ANTXR1    | Q9H6X2          | Anthrax toxin receptor 1                                 | 2             |                                                  |   |   |   |   |   |   |   |   |    |    |    |       | 3                  |     |
| ITGB1     | P05556-3        | Isoform 3 of Integrin beta-1                             | 1             | █                                                |   |   |   |   |   |   |   |   |    |    |    |       | 3                  |     |
| APOF      | Q13790          | Apolipoprotein F                                         | 2             |                                                  |   |   |   |   |   |   |   |   |    |    |    |       | 3                  |     |
| SHBG      | P04278          | Sex hormone-binding globulin                             | 2             |                                                  |   |   |   |   |   |   |   |   |    |    |    |       | 3                  |     |
| QSOX1     | O00391          | Sulfhydryl oxidase 1                                     | 2             |                                                  |   |   |   |   |   |   |   |   |    |    |    |       | 3                  |     |
| P80748    | P80748          | Ig lambda chain V-III region LOI                         | 2             |                                                  |   |   |   |   |   |   |   |   |    |    |    |       | 3                  |     |
| ACTB      | P60709          | Actin, cytoplasmic 1                                     | 4             |                                                  |   |   |   |   |   |   |   |   |    |    |    |       | 3                  |     |
| LPA       | P08519          | Apolipoprotein(a)                                        | 2             |                                                  |   |   |   |   |   |   |   |   |    |    |    |       | 3                  |     |
| P06316    | P06316          | Ig lambda chain V-I region BL2                           | 4             |                                                  |   |   |   |   |   |   |   |   |    |    |    | █     | 3                  |     |
| ATRN      | O75882          | Attractin                                                | 2             |                                                  |   |   |   |   |   |   |   |   |    |    |    |       | 3                  |     |
| APOA5     | Q6Q788          | Apolipoprotein A-V                                       | 2             |                                                  |   |   |   |   |   |   |   |   |    |    |    |       | 3                  |     |
| SERPINA4  | P29622          | Kallistatin                                              | 8             |                                                  |   |   |   |   |   |   |   |   |    |    |    |       | 3                  |     |
| CFHR4     | Q92496          | Complement factor H-related protein 4                    | 4             |                                                  |   |   |   |   |   |   |   |   |    |    |    |       | 3                  |     |
|           |                 | HLA class I histocompatibility antigen, A-24 alpha chain | 2             |                                                  |   |   |   |   |   |   |   |   |    |    |    |       | 3                  |     |
| HLA-A     | P05534          |                                                          | 2             |                                                  |   |   |   |   |   |   |   |   |    |    |    |       | 3                  |     |
| IGHA1     | P01876          | Ig alpha-1 chain C region                                | 4             |                                                  |   |   |   |   |   |   |   |   |    |    |    |       | 3                  |     |
| CFHR5     | Q5VYL6          | Complement factor H-related protein 5                    | 2             |                                                  |   |   |   |   |   |   |   |   |    |    |    |       | 3                  |     |
| F7        | P08709          | Coagulation factor VII                                   | 2             | █                                                |   |   |   |   |   |   |   |   |    |    |    |       | 3                  |     |
| SERPINA6  | P08185          | Corticosteroid-binding globulin                          | 3             |                                                  |   |   |   |   |   |   |   |   |    |    |    |       | 3                  |     |
| C4BPA     | P04003          | C4b-binding protein alpha chain                          | 2             |                                                  |   |   |   |   |   |   |   |   |    |    |    |       | 3                  |     |
| CA6       | P23280          | Carbonic anhydrase 6                                     | 2             |                                                  |   |   |   |   |   |   |   |   |    |    |    |       | 3                  |     |
| C8B       | P07358          | Complement component C8 beta chain                       | 4             |                                                  |   |   |   |   |   |   |   |   |    |    |    |       | 3                  |     |
| P01593    | P01593          | Ig kappa chain V-I region AG                             | 6             |                                                  |   |   |   |   |   |   |   |   |    |    |    |       | 3                  |     |
| LTF       | P02788          | Lactotransferrin                                         | 4             |                                                  |   |   |   |   |   |   |   |   |    |    |    |       | 3                  |     |
| TLN1      | Q9Y490          | Talin-1                                                  | 8             |                                                  |   |   |   |   |   |   |   |   |    |    |    |       | 3                  |     |
| ORM2      | P19652          | Alpha-1-acid glycoprotein 2                              | 7             |                                                  |   |   |   |   |   |   |   |   |    |    |    |       | 3                  |     |
| VWF       | P04275          | von Willebrand factor                                    | 4             |                                                  |   |   |   |   |   |   |   |   |    |    |    |       | 3                  |     |
| F10       | P00742          | Coagulation factor X                                     | 4             | █                                                |   |   |   |   |   |   |   |   |    |    |    |       | 3                  |     |
| GSN       | P06396          | Gelsolin                                                 | 8             |                                                  |   |   |   |   |   |   |   |   |    |    |    |       | 3                  |     |
| AFM       | P43652          | Afamin                                                   | 4             |                                                  |   |   |   |   |   |   |   |   |    |    |    |       | 3                  |     |
| F2        | P00734          | Prothrombin                                              | 10            |                                                  |   |   |   |   |   |   |   |   |    |    |    |       | 3                  |     |
| IHH       | Q14623          | Indian hedgehog protein                                  | 8             |                                                  |   |   |   |   |   |   |   |   |    |    |    |       | 3                  |     |
| APOC4     | P55056          | Apolipoprotein C-IV                                      | 10            |                                                  |   |   |   |   |   |   |   |   |    |    |    |       | 3                  |     |
| F13B      | P05160          | Coagulation factor XIII B chain                          | 10            |                                                  |   |   |   |   |   |   |   |   |    |    |    |       | 3                  |     |
| LUM       | P51884          | Lumican                                                  | 10            |                                                  |   |   |   |   |   |   |   |   |    |    |    |       | 3                  |     |
| RBP4      | P02753          | Retinol-binding protein 4                                | 11            | █                                                | █ |   |   |   |   |   |   |   |    |    |    |       | 3                  |     |

**Supplemental Table V. HDL proteome distribution across HDL size (page 3/3).** List of 145 proteins identified on HDL in one or more participants on the high fat and high carbohydrate diets. The order in which the proteins are listed, the Set #, and Group # correspond with **Figure 7B-D**. # of datasets, number of datasets in which each protein was identified. A total of 24 proteome datasets were generated, one for each of the 12 participants on both diets. Dark gray boxes indicate proteins that were identified in a given participant on both diets; light grey boxes indicate proteins that were not identified in a given participant on either diet; blue boxes indicate proteins identified in a given participant only on the high fat diet; and red boxes indicate proteins identified in a given participant only on the high carbohydrate diet.



| Target antigen                                                                                     | Vendor or Source   | Catalog #  | Working concentration |
|----------------------------------------------------------------------------------------------------|--------------------|------------|-----------------------|
| goat anti-human polyclonal antibody against ApoA1 (coating)                                        | Academy biomedical | 11A-G2b    | 5 ug/mL               |
| goat anti-human polyclonal antibody against ApoA1, biotin conjugate (detection)                    | Academy biomedical | 11B-G2b    | 1 ug/mL               |
| goat anti-human polyclonal antibody against ApoA2 (coating)                                        | Academy biomedical | 12A-G1b    | 5 ug/mL               |
| goat anti-human polyclonal antibody against ApoA2, HRP conjugate (detection)                       | Academy biomedical | 12H-G2b    | 1 ug/mL               |
| goat anti-human polyclonal antibody against ApoC3 (coating)                                        | Academy biomedical | 33A-G1b    | 5 ug/mL               |
| goat anti-human polyclonal antibody against ApoC3, HRP conjugate (detection)                       | Academy biomedical | 33H-G2b    | 1 ug/mL               |
| goat anti-human polyclonal antibody against ApoE (coating)                                         | Academy biomedical | 50H-G1b    | 10 ug/mL              |
| goat anti-human polyclonal antibody against ApoE, HRP conjugate (detection)                        | Academy biomedical | 50S-G1b    | 1 ug/mL               |
| mouse anti-human monoclonal antibody against ApoJ (coating)                                        | R&D Systems        | MAB29372   | 3 ug/mL               |
| mouse anti-human monoclonal antibody against ApoJ, biotin conjugate (detection)                    | R&D Systems        | BAM29373   | 1 ug/mL               |
| rabbit anti-human polyclonal antibody against ApoL1 (coating)                                      | Proteintech        | 11486-2-AP | 5 ug/mL               |
| rabbit anti-human polyclonal antibody against ApoL1 (Biotin conjugate prepared in lab) (detection) | Proteintech        | 11486-2-AP | 1 ug/mL               |

**Major Resources Table. Antibodies used to determine protein concentrations by ELISA.**

Levels (mg/dL) of ApoA1, ApoA2, ApoC3, ApoE, ApoJ, and ApoL1 in plasma and on HDL were measured in participants #1-12 and participants #1-6, respectively, on both diets by enzyme-linked immunosorbent assay (ELISA) using the antibodies listed.
